# Supplementary material
Source: MDPI journal article supplement (https://www.mdpi.com/2073-4441/13/9/1312)
Supplement: s1 [file s1]

---

## Supplementary material for Manuscript “Micropollutants in Urban Stormwater Runoff of Different Land Uses”

### Tables

Table S1: List of monitored substances, analytical methods, and detection limits.

Table S2: Results of Shapiro-Wilk test to test for normal distributions of concentrations per catchment type (prerequisite for application of analysis of variance (ANOVA)).

Table S3: Results of Kruskal-Wallis test and Dunn test to test for significance of concentration differences between catchment types.

Table S4: Overview of results of statistical analysis to evaluate the statistical significance of concentration differences.

Red: concentrations significantly higher to at least 2 catchments, blue: concentrations significantly lower to at least 2 catchments.

### Figures

Figure S1: Schematic view of preparation of volume-proportional composite sample incorporating flow data measured in respective storm sewer during sampled rain event.

**Table S1.** List of monitored substances, analytical methods, and limit of quantification (LOQ).

| Substance group                                | Substance              | Device <sup>1</sup>   | Method           | Unit               | LOQ       |
|------------------------------------------------|------------------------|-----------------------|------------------|--------------------|-----------|
| <b>Standard parameters</b>                     | BOD <sub>5</sub>       |                       | DIN EN 1899-1    | mg L <sup>-1</sup> | 3         |
|                                                | COD                    | photometric (cuvette) | DIN ISO15705     | mg L <sup>-1</sup> |           |
|                                                | o-PO <sub>4</sub>      | photometric           | DIN EN 1189      | mg L <sup>-1</sup> | 0.01      |
|                                                | P (total)              | ICP-AES               | DIN EN ISO 11885 | mg L <sup>-1</sup> | 0.03      |
|                                                | TSS                    |                       | DIN EN 872       | mg L <sup>-1</sup> |           |
|                                                | NH <sub>4</sub> -N     |                       | DIN 38 406-E05-1 | mg L <sup>-1</sup> | 0.04      |
| <b>Heavy metals</b>                            | Pb                     | ICP-AES or ICP-MSMS   | DIN EN ISO 11885 | µg L <sup>-1</sup> | 10 or 0.5 |
|                                                | Cd                     | ICP-MSMS              | DIN EN ISO 11885 | µg L <sup>-1</sup> | 0.05      |
|                                                | Cr                     | ICP-MSMS              | DIN EN ISO 11885 | µg L <sup>-1</sup> | 0.2       |
|                                                | Cu                     | ICP-AES               | DIN EN ISO 11885 | µg L <sup>-1</sup> | 10        |
|                                                | Ni                     | ICP-MSMS              | DIN EN ISO 11885 | µg L <sup>-1</sup> | 0.5       |
|                                                | Ti                     | ICP-AES               | DIN EN ISO 11885 | µg L <sup>-1</sup> | 2         |
|                                                | V                      | ICP-MSMS              | DIN EN ISO 11885 | µg L <sup>-1</sup> | 0.1       |
|                                                | Zn                     | ICP-AES               | DIN EN ISO 11885 | µg L <sup>-1</sup> | 15        |
| <b>Tracer substances</b>                       | Caffeine               | LC-MSMS               | DIN 38407-F36    | µg L <sup>-1</sup> | 0.1       |
|                                                | Carbamazepine          | LC-MSMS               | DIN 38407-F36    | µg L <sup>-1</sup> | 0.02      |
|                                                | Acesulfame             | LC-MSMS               | DIN 38407-F36    | µg L <sup>-1</sup> | 0.1       |
|                                                | FAA                    | LC-MSMS or LC-HRMS    | DIN 38407-F36    | µg L <sup>-1</sup> | 0.02      |
|                                                | Gabapentin             | LC-MSMS               | DIN 38407-F36    | µg L <sup>-1</sup> | 0.03      |
| <b>Organophosphorus flame retardants (OPs)</b> | TBP                    | LC-HRMS               | DIN 38407-F36    | µg L <sup>-1</sup> | 0.1       |
|                                                | TCEP                   | LC-HRMS               | DIN 38407-F36    | µg L <sup>-1</sup> | 0.1       |
|                                                | TCP                    | LC-HRMS               | DIN 38407-F36    | µg L <sup>-1</sup> | 0.1       |
|                                                | TDCEP                  | LC-HRMS               | DIN 38407-F36    | µg L <sup>-1</sup> | 0.1       |
|                                                | TBEP                   | LC-HRMS               | DIN 38407-F36    | µg L <sup>-1</sup> | 0.1       |
| <b>Phthalates</b>                              | Benzylbutylphthalate   | GC-MSMS               | DIN EN ISO 18856 | µg L <sup>-1</sup> | 0.3       |
|                                                | Dibutylphthalate       | GC-MSMS               | DIN EN ISO 18856 | µg L <sup>-1</sup> | 0.5       |
|                                                | Diethylphthalate       | GC-MSMS               | DIN EN ISO 18856 | µg L <sup>-1</sup> | 0.3       |
|                                                | Dimethylphthalate      | GC-MSMS               | DIN EN ISO 18856 | µg L <sup>-1</sup> | 0.3       |
|                                                | Dioctylphthalate       | GC-MSMS               | DIN EN ISO 18856 | µg L <sup>-1</sup> | 0.5       |
|                                                | DEHP                   | GC-MSMS               | DIN EN ISO 18856 | µg L <sup>-1</sup> | 0.2       |
|                                                | DIDP + DINP            | GC-MSMS               | DIN EN ISO 18856 | µg L <sup>-1</sup> | 0.5       |
| <b>Biocides/pesticides</b>                     | Carbendazim            | LC-MSMS               | DIN 38407-F36    | µg L <sup>-1</sup> | 0.02      |
|                                                | Cybutryne              | LC-MSMS               | DIN 38407-F36    | µg L <sup>-1</sup> | 0.02      |
|                                                | Diazinon               | LC-MSMS               | DIN 38407-F36    | µg L <sup>-1</sup> | 0.02      |
|                                                | Diuron                 | LC-MSMS               | DIN 38407-F36    | µg L <sup>-1</sup> | 0.03      |
|                                                | Tebuconazole           | LC-MSMS               | DIN 38407-F36    | µg L <sup>-1</sup> | 0.02      |
|                                                | 2,4-D                  | LC-MSMS               | DIN 38407-F36    | µg L <sup>-1</sup> | 0.02      |
|                                                | 2,6-DCBA               | LC-MSMS               | DIN 38407-F36    | µg L <sup>-1</sup> | 0.03      |
|                                                | AMPA                   | LC-MSMS               | DIN 38407-F36    | µg L <sup>-1</sup> | 0.1       |
|                                                | Glyphosate             | LC-MSMS               | DIN 38407-F36    | µg L <sup>-1</sup> | 0.02      |
|                                                | Isoproturon            | LC-MSMS               | DIN 38407-F36    | µg L <sup>-1</sup> | 0.03      |
|                                                | Mecoprop               | LC-MSMS               | DIN 38407-F36    | µg L <sup>-1</sup> | 0.02      |
|                                                | Terbutryn              | LC-HRMS               | DIN 38407-F36    | µg L <sup>-1</sup> | 0.01      |
|                                                | Thiacloprid            | LC-MSMS               | DIN 38407-F36    | µg L <sup>-1</sup> | 0.02      |
|                                                | DEET                   | LC-MSMS               | DIN 38407-F36    | µg L <sup>-1</sup> | 0.04      |
|                                                | Imidacloprid           | LC-HRMS               | DIN 38407-F36    | µg L <sup>-1</sup> | 0.05      |
|                                                | Simazine               | LC-MSMS               | DIN 38407-F36    | µg L <sup>-1</sup> | 0.03      |
|                                                | Terbuthylazine         | LC-MSMS               | DIN 38407-F36    | µg L <sup>-1</sup> | 0.03      |
|                                                | Desethylterbuthylazine | LC-MSMS               | DIN 38407-F36    | µg L <sup>-1</sup> | 0.03      |

| Substance group                         | Substance               | Device <sup>1</sup> | Method             | Unit               | LOQ   |
|-----------------------------------------|-------------------------|---------------------|--------------------|--------------------|-------|
| Industrial chemicals                    | BIT                     | LC-MSMS             | DIN 38407-F36      | µg L <sup>-1</sup> | 0.03  |
|                                         | OIT                     | LC-MSMS             | DIN 38407-F36      | µg L <sup>-1</sup> | 0.03  |
|                                         | Benzothiazole           | LC-HRMS             | DIN EN ISO 18856   | µg L <sup>-1</sup> | 0.05  |
|                                         | MTBT                    | LC-HRMS             | DIN EN ISO 18856   | µg L <sup>-1</sup> | 0.05  |
|                                         | OH-Benzothiazole        | LC-HRMS             | DIN EN ISO 18856   | µg L <sup>-1</sup> | 0.02  |
|                                         | Benzotriazoles          | LC-HRMS             | DIN EN ISO 18856   | µg L <sup>-1</sup> | 0.05  |
|                                         | Tolyltriazoles          | LC-HRMS             | DIN EN ISO 18856   | µg L <sup>-1</sup> | 0.03  |
|                                         | PFOA                    | LC-HRMS             | DIN EN ISO 18856   | µg L <sup>-1</sup> | 0.01  |
|                                         | PFOS                    | LC-HRMS             | DIN EN ISO 18856   | µg L <sup>-1</sup> | 0.05  |
|                                         | Nonylphenols            | GC-MS               | DIN EN ISO 18857-2 | µg L <sup>-1</sup> | 5     |
|                                         | 2-Phenylphenol          | GC-MS               | DIN EN ISO 18857-2 | µg L <sup>-1</sup> | 0.3   |
|                                         | 4-tert-Octylphenol      | GC-MS               | DIN EN ISO 18857-2 | µg L <sup>-1</sup> | 0.4   |
|                                         | 4-tert-Butylphenol      | GC-MS               | DIN EN ISO 18857-2 | µg L <sup>-1</sup> | 0.1   |
|                                         | Bisphenol F             | GC-MS               | DIN EN ISO 18857-2 | µg L <sup>-1</sup> | 0.3   |
|                                         | Bisphenol A             | GC-MS               | DIN EN ISO 18857-2 | µg L <sup>-1</sup> | 0.2   |
| Fuel additive                           | MTBE                    |                     |                    | µg L <sup>-1</sup> | 0.03  |
| Other                                   | Nicotine                | LC-HRMS             | DIN 38407-F36      | µg L <sup>-1</sup> | 0.2   |
| Polycyclic aromatic hydrocarbons (PAHs) | Naphthalene             | GC-MSMS             | DIN 38407-F39      | µg L <sup>-1</sup> | 0.05  |
|                                         | Acenaphthylene          | GC-MSMS             | DIN 38407-F39      | µg L <sup>-1</sup> | 0.05  |
|                                         | Acenaphthene            | GC-MSMS             | DIN 38407-F39      | µg L <sup>-1</sup> | 0.05  |
|                                         | Fluorene                | GC-MSMS             | DIN 38407-F39      | µg L <sup>-1</sup> | 0.01  |
|                                         | Phenanthrene            | GC-MSMS             | DIN 38407-F39      | µg L <sup>-1</sup> | 0.01  |
|                                         | Anthracene              | GC-MSMS             | DIN 38407-F39      | µg L <sup>-1</sup> | 0.01  |
|                                         | Fluoranthene            | GC-MSMS             | DIN 38407-F39      | µg L <sup>-1</sup> | 0.01  |
|                                         | Pyrene                  | GC-MSMS             | DIN 38407-F39      | µg L <sup>-1</sup> | 0.01  |
|                                         | Benzo[a]anthracene      | GC-MSMS             | DIN 38407-F39      | µg L <sup>-1</sup> | 0.01  |
|                                         | Chrysene                | GC-MSMS             | DIN 38407-F39      | µg L <sup>-1</sup> | 0.01  |
|                                         | Benzo[b]fluoranthene    | GC-MSMS             | DIN 38407-F39      | µg L <sup>-1</sup> | 0.01  |
|                                         | Benzo[k]fluoranthene    | GC-MSMS             | DIN 38407-F39      | µg L <sup>-1</sup> | 0.01  |
|                                         | Benzo[a]pyrene          | GC-MSMS             | DIN 38407-F39      | µg L <sup>-1</sup> | 0.005 |
|                                         | Dibenz[a,h]anthracene   | GC-MSMS             | DIN 38407-F39      | µg L <sup>-1</sup> | 0.01  |
|                                         | Benzo[g,h,i]perylene    | GC-MSMS             | DIN 38407-F39      | µg L <sup>-1</sup> | 0.01  |
|                                         | Indeno[1,2,3-c,d]pyrene | GC-MSMS             | DIN 38407-F39      | µg L <sup>-1</sup> | 0.01  |
|                                         | PAH 16 EPA              | GC-MSMS             | DIN 38407-F39      | µg L <sup>-1</sup> | 0.01  |
| Organotin compounds                     | Monobutyltin            |                     |                    | µg L <sup>-1</sup> | 0.01  |
|                                         | Dibutyltin              |                     |                    | µg L <sup>-1</sup> | 0.01  |
|                                         | Tributyltin             |                     |                    | µg L <sup>-1</sup> | 0.01  |
|                                         | Tetrabutyltin           |                     |                    | µg L <sup>-1</sup> | 0.01  |
|                                         | Triphenyltin            |                     |                    | µg L <sup>-1</sup> | 0.01  |
| Polybrominated diphenyl ethers (PBDEs)  | BDE 28                  |                     |                    | µg L <sup>-1</sup> | 0.01  |
|                                         | BDE 47                  |                     |                    | µg L <sup>-1</sup> | 0.01  |
|                                         | BDE 99                  |                     |                    | µg L <sup>-1</sup> | 0.01  |
|                                         | BDE 100                 |                     |                    | µg L <sup>-1</sup> | 0.01  |
|                                         | BDE 153                 |                     |                    | µg L <sup>-1</sup> | 0.01  |
|                                         | BDE 154                 |                     |                    | µg L <sup>-1</sup> | 0.01  |
|                                         | Decabromodiphenyl ether |                     |                    | µg L <sup>-1</sup> | 0.05  |
| Polychlorinated biphenyls (PCBs)        | Congener 28             |                     |                    | µg L <sup>-1</sup> | 0.05  |
|                                         | Congener 52             |                     |                    | µg L <sup>-1</sup> | 0.05  |
|                                         | Congener 101            |                     |                    | µg L <sup>-1</sup> | 0.05  |
|                                         | Congener 118            |                     |                    | µg L <sup>-1</sup> | 0.05  |

| Substance group | Substance    | Device <sup>1</sup> | Method | Unit               | LOQ  |
|-----------------|--------------|---------------------|--------|--------------------|------|
|                 | Congener 138 |                     |        | µg L <sup>-1</sup> | 0.05 |
|                 | Congener 153 |                     |        | µg L <sup>-1</sup> | 0.05 |
|                 | Congener 180 |                     |        | µg L <sup>-1</sup> | 0.05 |

**orange coloured:** never detected, therefore measurements were stopped after three months of monitoring.

<sup>1</sup>ICP-AES: Inductively Coupled Plasma - Atomic Emission Spectrometry  
ICP-MSMS: Inductively Coupled Plasma – Tandem Mass Spectrometry  
LC-MSMS: Liquid Chromatography – Tandem Mass Spectrometry  
LC-HRMS: Liquid Chromatography – High Resolution Mass Spectrometry  
GC-MS: Gas Chromatography – Mass Spectrometry  
GC-MSMS: Gas Chromatography – Tandem Mass Spectrometry

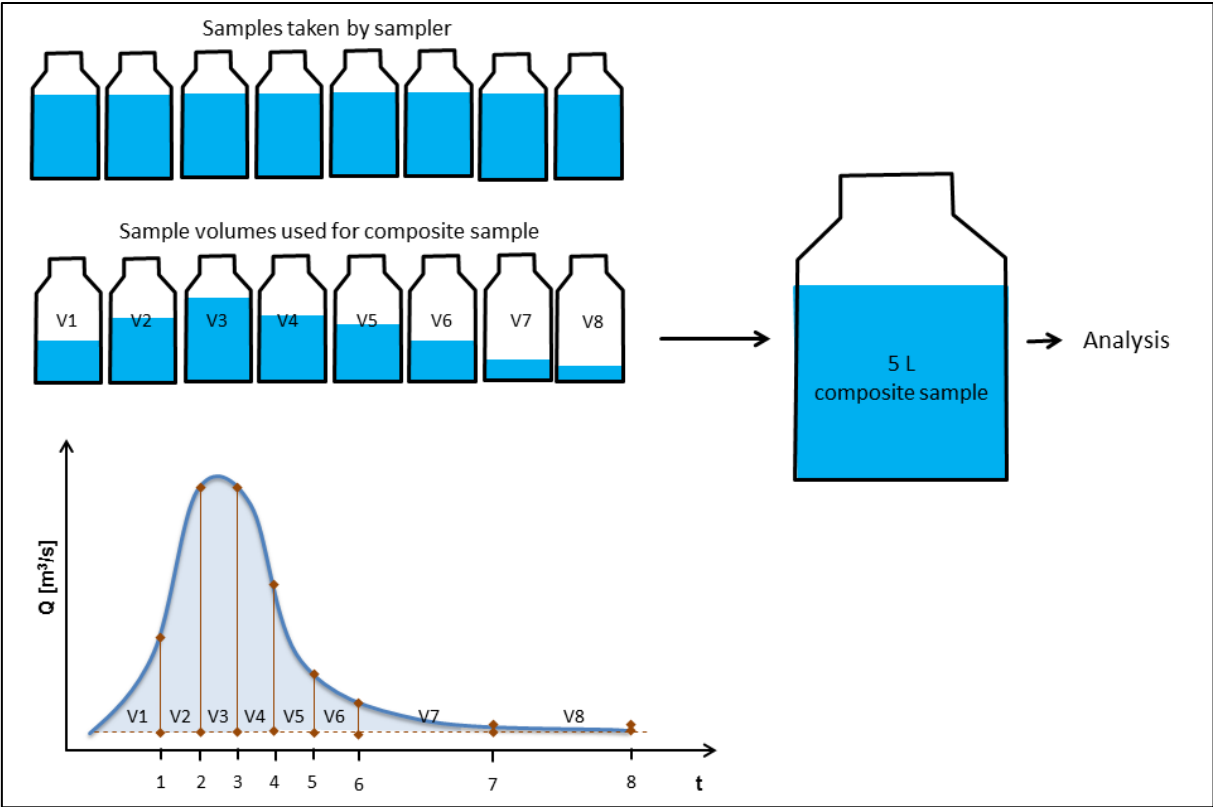

**Figure S1.** Schematic view of preparation of volume-proportional composite sample incorporating flow data measured in respective storm sewer during sampled rain event.

**Table S2.** Results of Shapiro–Wilk test to test for normal distributions of concentrations per catchment type (prerequisite for application of analysis of variance (ANOVA)).

|                             |                         | p-values for normal distribution (ND)<br>(Shapiro-Wilk Test) |           |          |          |                      |     |  |
|-----------------------------|-------------------------|--------------------------------------------------------------|-----------|----------|----------|----------------------|-----|--|
| Compound                    |                         | OLD                                                          | NEW       | OFH      | STR      | COM                  | ND  |  |
| <b>Metals</b>               |                         |                                                              |           |          |          |                      |     |  |
|                             | Cu                      | 0.00011                                                      | 0.0068    | 0.65     | 0.0093   | $1.7 \times 10^{-9}$ | no  |  |
|                             | Zn                      | 0.000048                                                     | 0.0024    | 0.0099   | 0.014    | $3.5 \times 10^{-9}$ | no  |  |
|                             | Pb                      | 0.000098                                                     | 0.0072    | 0.73     | 0.0065   | $3.6 \times 10^{-8}$ | no  |  |
|                             | Ti                      | 0.00043                                                      | 0.00021   | 0.26     | 0.021    | $2.2 \times 10^{-9}$ | no  |  |
|                             | V                       | 0.0025                                                       | 0.0088    | 0.97     | 0.063    | 0.000015             | no  |  |
|                             | Cr                      | 0.029                                                        | 0.0046    | 0.16     | 0.022    | 0.0000024            | no  |  |
|                             | Ni                      | 0.0066                                                       | 0.0053    | 0.61     | 0.044    | 0.00012              | no  |  |
|                             | Cd                      | 0.022                                                        | 0.048     | 0.89     | 0.32     | 0.000088             | no  |  |
| <b>Tracer substances</b>    |                         |                                                              |           |          |          |                      |     |  |
|                             | Caffeine                | 0.0059                                                       | 0.053     | 0.031    | 0.000028 | 0.11                 | no  |  |
|                             | Acesulfame              | 0.00078                                                      | -         | 0.0022   | -        | 0.0000005            | no  |  |
| <b>Organophosphates</b>     |                         |                                                              |           |          |          |                      |     |  |
|                             | TCPP                    | 0.0045                                                       | 0.22      | -        | 0.0088   | 0.0000025            | no  |  |
|                             | TBEP                    | 0.0086                                                       | 0.0039    | 0.25     | 0.31     | $1.3 \times 10^{-8}$ | no  |  |
| <b>Phthalates</b>           |                         |                                                              |           |          |          |                      |     |  |
|                             | Diethylhexylphthalate   | $6.8 \times 10^{-8}$                                         | 0.0051    | 0.039    | 0.00093  | 0.0000025            | no  |  |
|                             | DIDP + DINP             | 0.00019                                                      | 0.029     | 0.62     | 0.0063   | 0.000018             | no  |  |
| <b>Biocides/Pesticides</b>  |                         |                                                              |           |          |          |                      |     |  |
|                             | Mecoprop                | 0.00000037                                                   | 0.0000081 | 0.0004   | -        | 0.0000093            | no  |  |
|                             | Diuron                  | 0.0011                                                       | -         | 0.013    | -        | -                    | no  |  |
|                             | Carbendazim             | 0.00025                                                      | -         | 0.000027 | -        | 0.0099               | no  |  |
|                             | Terbutryn               | 0.00082                                                      | -         | 0.0076   | -        | 0.14                 | no  |  |
|                             | Glyphosat               | 0.00000035                                                   | 0.0013    | 0.0046   | 0.000015 | 0.00000022           | no  |  |
| <b>Industrial chemicals</b> |                         |                                                              |           |          |          |                      |     |  |
| Benzothiazoles              |                         |                                                              |           |          |          |                      |     |  |
|                             | Benzothiazol            | 0.9                                                          | 0.17      | 0.18     | 0.059    | 0.27                 | yes |  |
|                             | MTBT                    | 0.00079                                                      | 0.69      | 0.012    | 0.23     | 0.39                 | no  |  |
|                             | Hydroxybenzothiazol     | 0.1                                                          | 0.019     | 0.023    | 0.0049   | 0.044                | no  |  |
| Benzotriazoles              |                         |                                                              |           |          |          |                      |     |  |
|                             | Benzotriazole           | $4.9 \times 10^{-8}$                                         | 0.042     | 0.85     | 0.31     | 0.0046               | no  |  |
|                             | Tolyltriazoles          | 0.0000024                                                    | 0.04      | 0.011    | 0.21     | 0.0000014            | no  |  |
| <b>PAH</b>                  |                         |                                                              |           |          |          |                      |     |  |
|                             | Chrysene                | 0.000011                                                     | 0.000013  | 0.0085   | 0.93     | 0.21                 | no  |  |
|                             | PAH 16 EPA              | 0.00021                                                      | 0.0001    | 0.0037   | 0.076    | 0.13                 | no  |  |
|                             | Benzo[a]pyrene          | 0.000018                                                     | -         | 0.00073  | 0.021    | 0.0018               | no  |  |
|                             | Benzo[a]anthracene      | 0.0028                                                       | 0.0026    | 0.025    | 0.81     | 0.22                 | no  |  |
|                             | Benzo[g,h,i]perylene    | 0.000047                                                     | -         | 0.00019  | 0.12     | 0.0013               | no  |  |
|                             | Pyrene                  | 0.000037                                                     | 0.000014  | 0.0021   | 0.018    | 0.022                | no  |  |
|                             | Benzo[k]fluoranthene    | 0.000051                                                     | -         | -        | 0.018    | 0.00009              | no  |  |
|                             | Indeno[1,2,3-c,d]pyrene | 0.013                                                        | 0.0002    | 0.0059   | 0.083    | 0.13                 | no  |  |
|                             | Anthracene              | 0.00023                                                      | -         | -        | 0.0061   | 0.003                | no  |  |
|                             | Fluoranthene            | 0.000065                                                     | 0.000024  | 0.0033   | 0.011    | 0.034                | no  |  |
|                             | Fluorene                | 0.0035                                                       | -         | -        | 0.0014   | -                    | no  |  |
|                             | Dibenz[a,h]anthracene   | 0.000049                                                     | -         | -        | 0.02     | -                    | no  |  |
|                             | Benzo[b]fluoranthene    | 0.0044                                                       | 0.0026    | 0.042    | 0.83     | 0.77                 | no  |  |
|                             | Phenanthrene            | 0.011                                                        | 0.000062  | 0.0048   | 0.22     | 0.16                 | no  |  |
| <b>Others</b>               |                         |                                                              |           |          |          |                      |     |  |
|                             | Nicotine                | 0.00052                                                      | 0.00014   | -        | 0.0082   | 0.000023             | no  |  |

**Table S3.** Results of Kruskal–Wallis test and Dunn test to test for significance of concentration differences between catchment types.

| Compound            |                       | Kruskal–Wallis Test (KWT)     |                                      | Dunn Test (p-values)  |                      |             |                      |                      |                      |                       |                       |                      |                      |
|---------------------|-----------------------|-------------------------------|--------------------------------------|-----------------------|----------------------|-------------|----------------------|----------------------|----------------------|-----------------------|-----------------------|----------------------|----------------------|
|                     |                       | p-value<br>all catch-<br>ment | Signif-<br>icant<br>differ-<br>ences | OLD-<br>NEW           | OLD-<br>OFH          | NEW-<br>OFH | OLD-<br>STR          | NEW-STR              | OFH-<br>STR          | OLD-<br>COM           | NEW-<br>COM           | OFH-<br>COM          | STR-<br>COM          |
| Metals              | TSS                   | 1.1 × 10 <sup>-6</sup>        | Yes                                  | 0.17                  | 0.32                 | 0.14        | 4 × 10 <sup>-4</sup> | 6 × 10 <sup>-7</sup> | 0.01                 | 0.27                  | 0.54                  | 0.23                 | 2 × 10 <sup>-6</sup> |
|                     | COD                   | 7.1 × 10 <sup>-5</sup>        | Yes                                  | 0.63                  | 0.71                 | 0.87        | 0.0026               | 1 × 10 <sup>-4</sup> | 0.005                | 0.36                  | 0.38                  | 0.81                 | 2 × 10 <sup>-5</sup> |
|                     | BOD                   | 2.5 × 10 <sup>-2</sup>        | Yes                                  | 0.38                  | 0.81                 | 0.61        | 0.4                  | 0.41                 | 0.79                 | 0.0052                | 0.41                  | 0.39                 | 0.93                 |
|                     | TP                    | 3.4 × 10 <sup>-9</sup>        | Yes                                  | 0.0051                | 0.27                 | 0.0044      | 0.13                 | 7 × 10 <sup>-5</sup> | 0.42                 | 6 × 10 <sup>-5</sup>  | 0.34                  | 1 × 10 <sup>-4</sup> | 4 × 10 <sup>-7</sup> |
|                     | PO <sub>4</sub> -P    | 4.2 × 10 <sup>-3</sup>        | yes                                  | 0.18                  | 0.68                 | 0.032       | 0.55                 | 0.32                 | 0.19                 | 0.026                 | 0.51                  | 0.0047               | 0.47                 |
|                     | Cu                    | 3.1 × 10 <sup>-13</sup>       | yes                                  | 0.2                   | 0.0084               | 0.14        | 1 × 10 <sup>-5</sup> | 0.0047               | 0.18                 | 1 × 10 <sup>-13</sup> | 1 × 10 <sup>-7</sup>  | 0.0042               | 0.085                |
|                     | Zn                    | 7.9 × 10 <sup>-21</sup>       | yes                                  | 5 × 10 <sup>-12</sup> | 2 × 10 <sup>-5</sup> | 0.065       | 0.03                 | 0.0009               | 0.1                  | 0.11                  | 3 × 10 <sup>-18</sup> | 1 × 10 <sup>-8</sup> | 0.0005               |
|                     | Pb                    | 2.1 × 10 <sup>-7</sup>        | yes                                  | 0.0008                | 0.2                  | 0.15        | 0.34                 | 0.0002               | 0.27                 | 0.06                  | 2 × 10 <sup>-8</sup>  | 0.054                | 0.5                  |
| Tracer substances   | Ti                    | 8.3 × 10 <sup>-8</sup>        | yes                                  | 0.27                  | 0.63                 | 0.21        | 7 × 10 <sup>-6</sup> | 1 × 10 <sup>-8</sup> | 0.0006               | 0.41                  | 0.3                   | 0.75                 | 2 × 10 <sup>-6</sup> |
|                     | V                     | 2.5 × 10 <sup>-5</sup>        | yes                                  | 0.42                  | 1                    | 1           | 0.0004               | 0.0003               | 0.16                 | 0.66                  | 1                     | 0.96                 | 0.0009               |
|                     | Cr                    | 4.5 × 10 <sup>-7</sup>        | yes                                  | 0.41                  | 0.58                 | 0.34        | 2 × 10 <sup>-5</sup> | 1 × 10 <sup>-7</sup> | 0.011                | 0.49                  | 0.081                 | 0.45                 | 0.0004               |
|                     | Ni                    | 1.2 × 10 <sup>-5</sup>        | yes                                  | 0.49                  | 0.39                 | 0.49        | 6 × 10 <sup>-5</sup> | 5 × 10 <sup>-5</sup> | 0.12                 | 0.017                 | 0.018                 | 0.44                 | 0.13                 |
|                     | Cd                    | 1.5 × 10 <sup>-7</sup>        | yes                                  | 1                     | 0.47                 | 0.91        | 0.027                | 0.015                | 0.12                 | 1 × 10 <sup>-5</sup>  | 3 × 10 <sup>-6</sup>  | 0.0055               | 0.39                 |
|                     | Caffeine              | 8.1 × 10 <sup>-4</sup>        | yes                                  | 0.0061                | 0.028                | 0.83        | 0.3                  | 0.36                 | 0.46                 | 0.42                  | 0.0034                | 0.019                | 0.25                 |
|                     | Acesulfame            | 0.257                         | no                                   |                       |                      |             |                      |                      |                      |                       |                       |                      |                      |
|                     | Organophosphates      |                               |                                      |                       |                      |             |                      |                      |                      |                       |                       |                      |                      |
| Phthalates          | TCPP                  | 0.24                          | no                                   |                       |                      |             |                      |                      |                      |                       |                       |                      |                      |
|                     | TBEP                  | 1 × 10 <sup>-9</sup>          | yes                                  | 0.0655                | 3 × 10 <sup>-8</sup> | 0.0004      | 5 × 10 <sup>-7</sup> | 0.0023               | 0.29                 | 0.012                 | 0.43                  | 0.0038               | 0.0142               |
| Biocides/Pesticides | DEHP                  | 1.4 × 10 <sup>-4</sup>        | yes                                  | 0.38                  | 0.3                  | 0.49        | 0.011                | 0.0004               | 0.0017               | 0.18                  | 0.014                 | 0.032                | 0.35                 |
|                     | DIDP + DINP           | 2.3 × 10 <sup>-9</sup>        | yes                                  | 0.1                   | 0.34                 | 0.61        | 0.0016               | 2 × 10 <sup>-6</sup> | 0.0001               | 0.0018                | 1 × 10 <sup>-6</sup>  | 0.0001               | 0.31                 |
| Benzothiazoles      | Mecoprop              | 1.7 × 10 <sup>-3</sup>        | yes                                  | 0.4607                | 0.0199               | 0.0747      | -                    | -                    | -                    | 0.0023                | 0.0207                | 0.3791               | -                    |
|                     | Diuron                | 2.0 × 10 <sup>-2</sup>        | yes                                  | -                     | 0.0203               | -           | -                    | -                    | -                    | -                     | -                     | -                    | -                    |
|                     | Carbendazim           | 2.0 × 10 <sup>-4</sup>        | yes                                  | -                     | 0.0223               | -           | -                    | -                    | -                    | 0.0001                | -                     | 0.1015               | -                    |
|                     | Terbutryn             | 5.0 × 10 <sup>-11</sup>       | yes                                  | -                     | 0.468                | -           | -                    | -                    | -                    | 0.0011                | -                     | 0.003                | -                    |
|                     | Glyphosat             | 3.5 × 10 <sup>-5</sup>        | yes                                  | 4 × 10 <sup>-5</sup>  | 1                    | 0.0041      | 0.83                 | 0.0008               | 1                    | 1                     | 0.0005                | 0.43                 | 1                    |
| Benzotriazoles      | Benzothiazole         | 0.00015                       | yes                                  | 0.44                  | 0.57                 | 0.75        | 0.0004               | 0.0005               | 0.015                | 0.039                 | 0.039                 | 0.24                 | 0.24                 |
|                     | MTBT                  | 1.6 × 10 <sup>-8</sup>        | yes                                  | 4 × 10 <sup>-5</sup>  | 0.3                  | 0.0028      | 0.29                 | 0.024                | 0.43                 | 3 × 10 <sup>-7</sup>  | 0.61                  | 0.0002               | 0.0022               |
| PAH                 | Hydroxybenzothiazole  | 4.5 × 10 <sup>-7</sup>        | yes                                  | 0.27                  | 0.45                 | 0.35        | 0.0001               | 2 × 10 <sup>-7</sup> | 1 × 10 <sup>-5</sup> | 0.51                  | 0.077                 | 0.22                 | 0.0012               |
|                     | Benzotriazole         | 6.7 × 10 <sup>-6</sup>        | yes                                  | 0.27                  | 0.002                | 0.04        | 0.34                 | 0.073                | 0.0001               | 0.0034                | 0.063                 | 0.28                 | 0.0002               |
| PAH                 | Tolyltriazoles        | 2.4 × 10 <sup>-6</sup>        | yes                                  | 0.73                  | 0.75                 | 0.38        | 0.022                | 0.0046               | 0.025                | 0.0046                | 0.024                 | 0.027                | 2 × 10 <sup>-7</sup> |
|                     | Chrysene              | 2.5 × 10 <sup>-5</sup>        | yes                                  | 0.0092                | 0.012                | 0.83        | 0.07                 | 2 × 10 <sup>-5</sup> | 5 × 10 <sup>-5</sup> | 0.43                  | 0.014                 | 0.015                | 0.065                |
| Others              | PAH 16 EPA            | 2.8 × 10 <sup>-7</sup>        | yes                                  | 0.0019                | 0.0035               | 0.43        | 0.08                 | 4 × 10 <sup>-6</sup> | 1 × 10 <sup>-5</sup> | 0.48                  | 0.016                 | 0.02                 | 0.023                |
|                     | Benzo[a]pyrene        | 4.0 × 10 <sup>-4</sup>        | yes                                  | -                     | 0.008                | -           | 0.1014               | -                    | 0.0001               | 0.1125                | -                     | 0.0932               | 0.0146               |
|                     | Benzo[a]anthracene    | 3.5 × 10 <sup>-5</sup>        | yes                                  | 0.0066                | 0.008                | 0.4         | 0.11                 | 3 × 10 <sup>-5</sup> | 6 × 10 <sup>-5</sup> | 0.7                   | 0.019                 | 0.018                | 0.069                |
|                     | Benzo[g,h,i]perylene  | 5.0 × 10 <sup>-4</sup>        | yes                                  | -                     | 0.008                | -           | 0.1161               | -                    | 0.0002               | 0.1148                | -                     | 0.0935               | 0.0183               |
|                     | Pyrene                | 5.1 × 10 <sup>-7</sup>        | yes                                  | 0.0029                | 0.0057               | 0.44        | 0.071                | 5 × 10 <sup>-6</sup> | 2 × 10 <sup>-5</sup> | 0.57                  | 0.016                 | 0.021                | 0.028                |
|                     | Benzo[k]fluoranthene  | 1.0 × 10 <sup>-2</sup>        | yes                                  | -                     | -                    | -           | 0.037                | -                    | -                    | 0.1354                | -                     | -                    | 0.0036               |
|                     | Indeno[1,2,3-c,d]py-  | 7.0 × 10 <sup>-6</sup>        | yes                                  | 0.0031                | 0.0099               | 0.5         | 0.22                 | 6 × 10 <sup>-5</sup> | 0.0003               | 0.65                  | 0.012                 | 0.026                | 0.13                 |
|                     | Anthracene            | 2.2 × 10 <sup>-2</sup>        | yes                                  | -                     | -                    | -           | 0.13                 | -                    | -                    | 0.076                 | -                     | -                    | 0.0089               |
|                     | Fluoranthene          | 1.5 × 10 <sup>-7</sup>        | yes                                  | 0.001                 | 0.0034               | 0.48        | 0.088                | 2 × 10 <sup>-6</sup> | 2 × 10 <sup>-5</sup> | 0.55                  | 0.0072                | 0.015                | 0.033                |
|                     | Fluorene              | 0.55                          | no                                   |                       |                      |             |                      |                      |                      |                       |                       |                      |                      |
|                     | Dibenz[a,h]anthracene | 1.2 × 10 <sup>-2</sup>        | yes                                  | -                     | -                    | -           | 0.012                | -                    | -                    | -                     | -                     | -                    | -                    |
|                     | Benzo[b]fluoranthene  | 3.3 × 10 <sup>-7</sup>        | yes                                  | 0.0059                | 0.01                 | 0.46        | 0.03                 | 2 × 10 <sup>-6</sup> | 1 × 10 <sup>-5</sup> | 0.86                  | 0.01                  | 0.015                | 0.028                |
|                     | Phenanthrene          | 3.1 × 10 <sup>-7</sup>        | yes                                  | 0.0008                | 0.0005               | 0.28        | 0.26                 | 2 × 10 <sup>-5</sup> | 1 × 10 <sup>-5</sup> | 0.2                   | 0.035                 | 0.02                 | 0.034                |

**Table S4.** Overview of results of statistical analysis to evaluate the statistical significance of concentration differences. Red: concentrations significantly higher in comparison to at least 2 catchments, blue: concentrations significantly lower in comparison to at least 2 catchments.

|                             | OLD | NEW | OFH | STR | COM |
|-----------------------------|-----|-----|-----|-----|-----|
| <b>Standard parameters</b>  |     |     |     |     |     |
| o-PO4-P                     |     |     |     |     |     |
| P                           |     |     |     |     |     |
| COD                         |     |     |     |     |     |
| TSS                         |     |     |     |     |     |
| BOD                         |     |     |     |     |     |
| <b>Metals</b>               |     |     |     |     |     |
| Cu                          |     |     |     |     |     |
| Zn                          |     |     |     |     |     |
| Pb                          |     |     |     |     |     |
| Ti                          |     |     |     |     |     |
| V                           |     |     |     |     |     |
| Cr                          |     |     |     |     |     |
| Ni                          |     |     |     |     |     |
| Cd                          |     |     |     |     |     |
| <b>Tracer substances</b>    |     |     |     |     |     |
| Acesulfam                   |     |     |     |     |     |
| Caffeine                    |     |     |     |     |     |
| <b>Organophosphates</b>     |     |     |     |     |     |
| TCPP                        |     |     |     |     |     |
| TBEP                        |     |     |     |     |     |
| <b>Phthalates</b>           |     |     |     |     |     |
| DEHP                        |     |     |     |     |     |
| DIDP + DINP                 |     |     |     |     |     |
| <b>Pesticides/Biocides</b>  |     |     |     |     |     |
| Mecoprop                    |     |     |     |     |     |
| Diuron                      |     |     |     |     |     |
| AMPA                        |     |     |     |     |     |
| Carbendazim                 |     |     |     |     |     |
| Terbutryn                   |     |     |     |     |     |
| Isoproturon                 |     |     |     |     |     |
| Glyphosat                   |     |     |     |     |     |
| <b>Industrial chemicals</b> |     |     |     |     |     |
| Hydroxybenzothiazole        |     |     |     |     |     |
| Tolyltriazole               |     |     |     |     |     |
| PFOA                        |     |     |     |     |     |
| Benzotriazole               |     |     |     |     |     |
| Benzo[thiazole              |     |     |     |     |     |
| MTBT                        |     |     |     |     |     |
| 4-tert-Butylphenol          |     |     |     |     |     |
| <b>PAH</b>                  |     |     |     |     |     |
| Chrysene                    |     |     |     |     |     |
| Sum of PAH 16               |     |     |     |     |     |
| Benzo[a]pyrene              |     |     |     |     |     |
| Benzo[a]anthracene          |     |     |     |     |     |
| Benzo[g,h,i]perylene        |     |     |     |     |     |
| Pyrene                      |     |     |     |     |     |
| Benzo[k]fluoranthene        |     |     |     |     |     |
| Indeno[1,2,3-c,d]pyrene     |     |     |     |     |     |
| Anthracene                  |     |     |     |     |     |
| Dibenz[a,h]anthracene       |     |     |     |     |     |
| Fluoranthene                |     |     |     |     |     |
| Fluorene                    |     |     |     |     |     |
| Benzo[b]fluoranthene        |     |     |     |     |     |
| Phenanthrene                |     |     |     |     |     |
